# Supplementary material
Source: Springer Nature journal article supplement (https://www.springermedizin.de/resource/supplementary/12891_2007_382_MOESM1_ESM.pdf/9510942)
Supplement: MOESM1 [file 9510942]

- Africa Wide (n = 3288)
- Cinahl (n = 15)
- PEDro (n = 10)
- Psycinfo (n = 4)
- Pubmed (n = 203)
- SA ePublications (n = 69)
- ScienceDirect (n = 14)

3627 Titles was screened by 1 independent reviewer

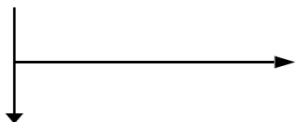

Excluded Articles (n = 3143)

Articles excluded based on the title that obviously did not conform to the aims of this review

484 Abstracts were retrieved and read by 1 independent reviewer

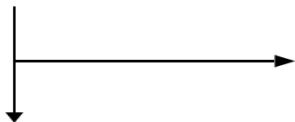

Excluded Articles (n = 424)

Articles were reviews, theses, duplicates, lectures, magazine articles, validation studies, surgical techniques, radiological, non-African, medical

59 Full text articles retrieved and read by 2 independent reviewers

2 articles retrieved via PEARLING

TOTAL = 61

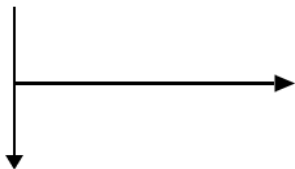

Excluded (n = 34)

Studies were duplicates (n = 3)

Studies did not report on the epidemiology of

LBP (n = 31)

Total of epidemiological studies that forms part of the review **(n=27)**
